# Supplementary material for: Dilation of Brain Veins and Perivascular Infiltration by Glioblastoma Cells in an In Vivo Assay of Early Tumor Angiogenesis
Source: Hindawi journal article supplement (doi:10.1155/2021/8891045), 2021-01-01
Supplement: f1 [file 8891045.f1.pdf]

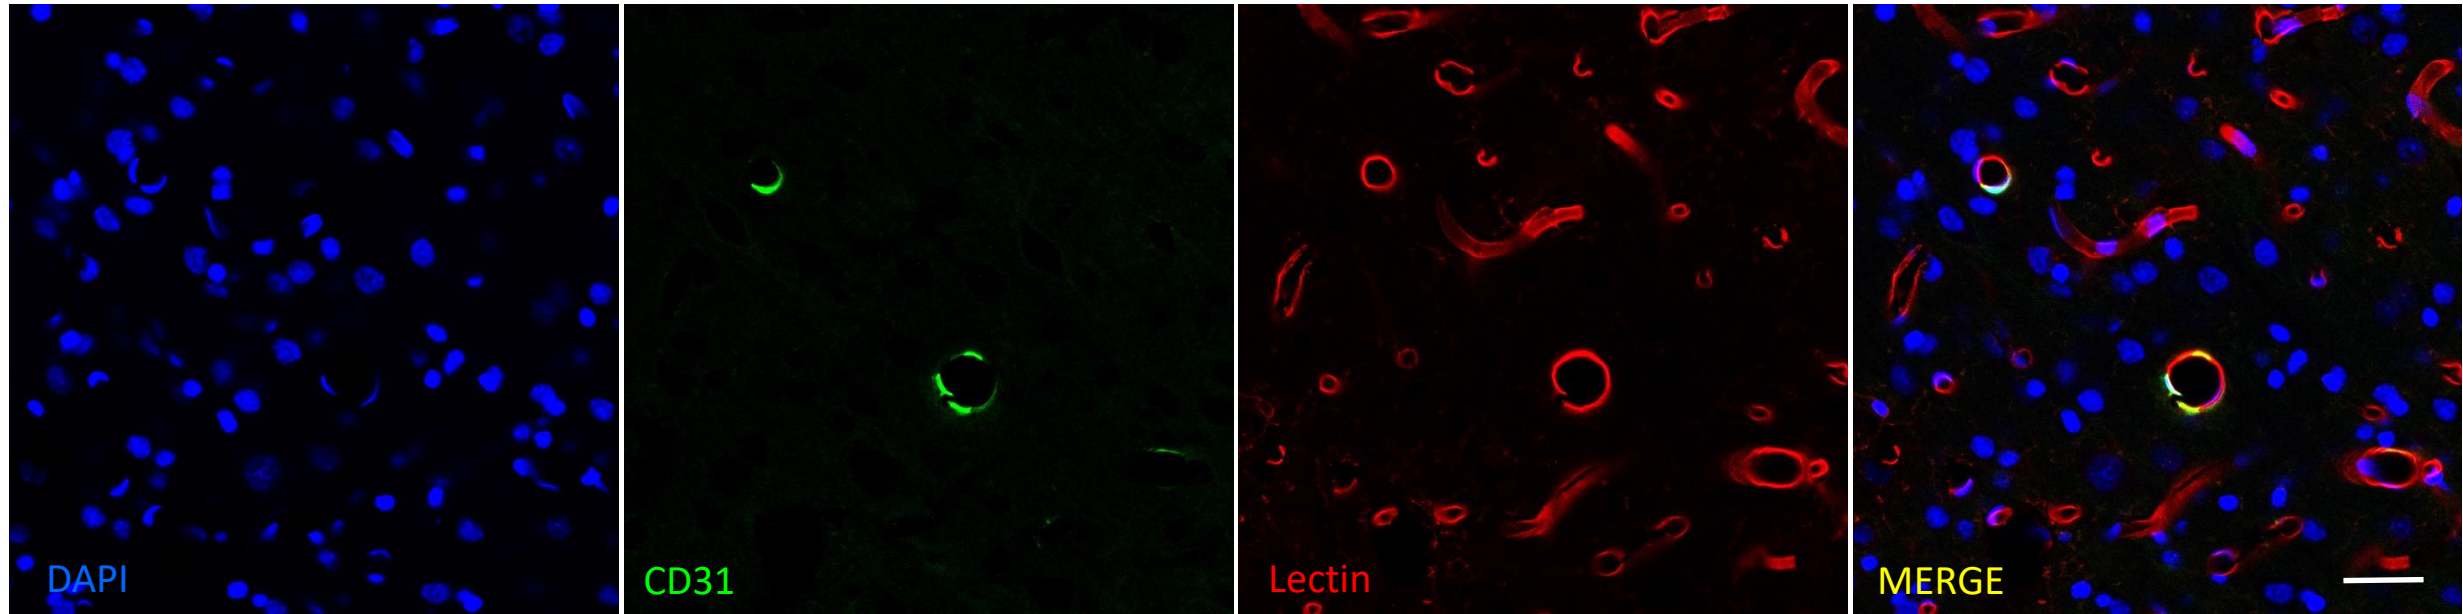

**Supplementary Figure S1.** Confocal microphotographs of brain microvessels in a control rat immunostained with endothelial markers. Lectin (*red*) stained much more microvessels compared to anti-CD31 staining (*green*). Branching of microvessels is rarely seen. Scale bar, 40  $\mu\text{m}$ .
